# Supplementary material for: Corrosion behaviour of welded low-carbon steel in the Arctic marine environment
Source: Royal Society of Chemistry journal article supplement (doi:10.1039/c8ra05371e), 2018-01-01
Supplement: c8ra05371e1.pdf [file c8ra05371e1.pdf]

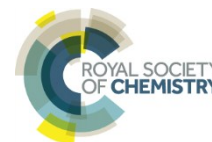

## Supplementary Information

### Corrosion behaviour of welded low-carbon steel in the Arctic marine environment

Yoo Youl Choi\* and Myung Hyun Kim

---

\* Author for correspondence:

Dr. Yoo Youl Choi

Phone: +82 70 8799 8797

E-mail: yychoi@krs.co.kr

#### Supplementary Information Figures and Tables

##### Specimen preparation

In this study, weld joints with a K-groove were selected because of their excellent mechanical properties and welding workability based on fully pre-welded performance tests of structural steel for Arctic offshore structures. The thick 100-mm rolled steel for welded structures was welded by a professional welder, and non-destructive testing (NDT) was performed to determine the presence of internal defects. After confirming the quality of the weld zone, all specimens were cut at the quarter thickness location and each specimen dimension was checked. The specimens were then subjected to surface grinding and cleaning for corrosion tests.

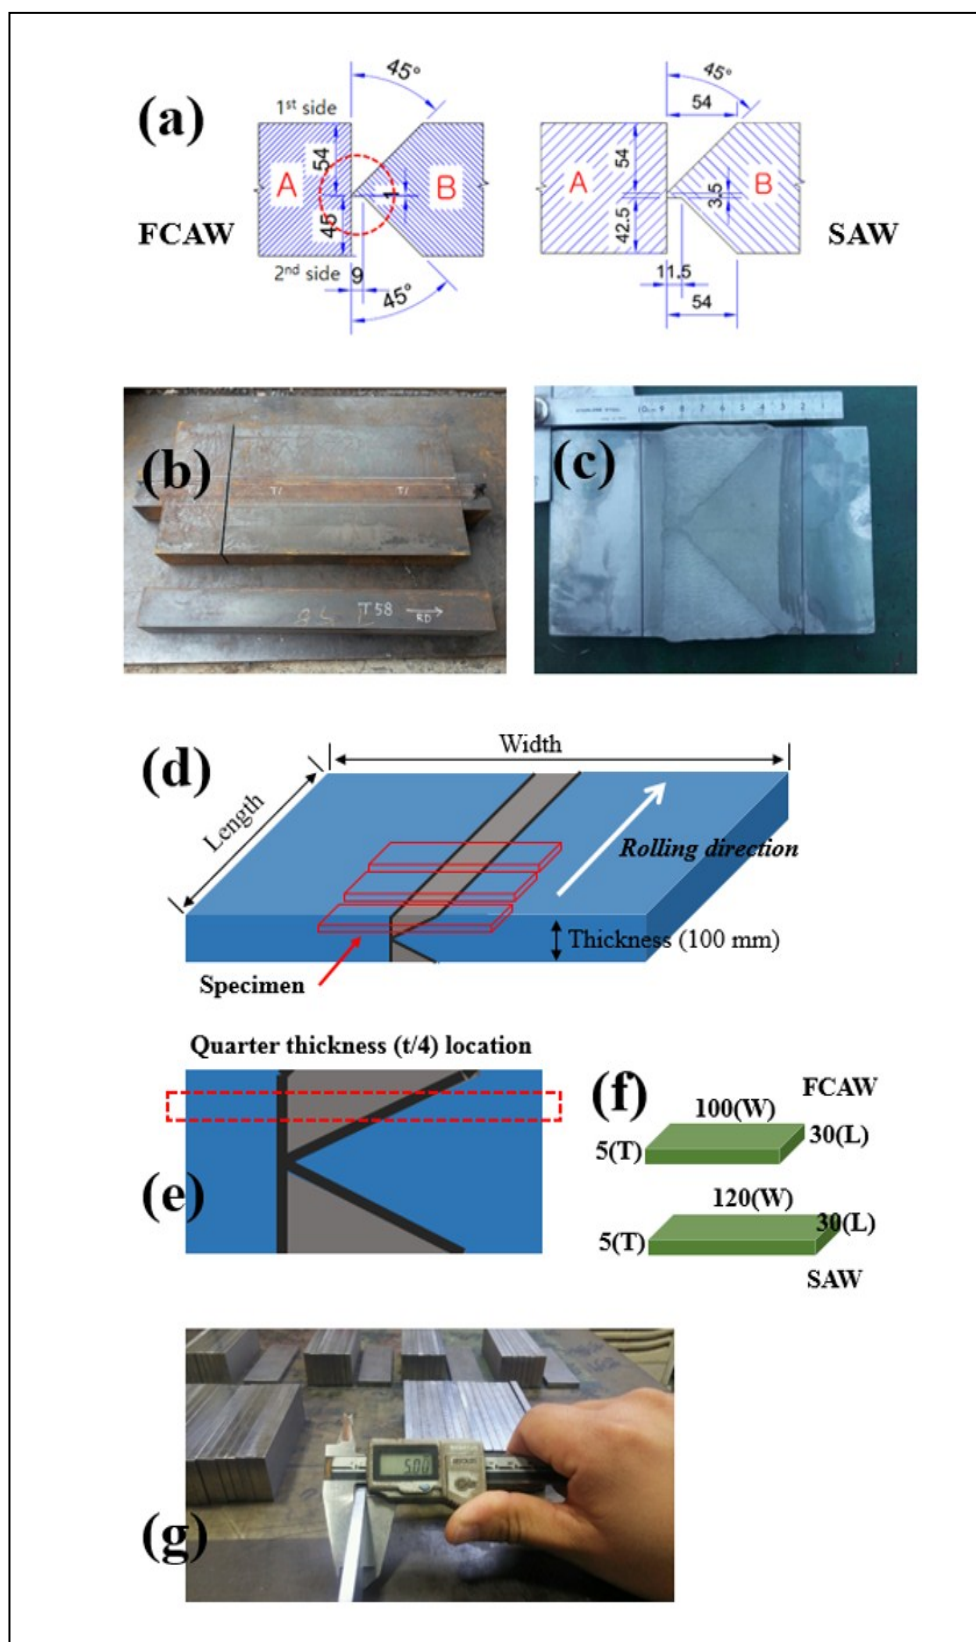

Figure S1. Figures showing the preparation process of the specimen.

(a) K-groove weld joint design for FCAW and SAW.

(b) Photograph of a plate of welded metal prepared by the FCAW process.

(c) Cross-sectional photograph of the weld joints prepared by the FCAW process.

(d) Diagram showing the cutting direction of specimens from the welded plate.

- (e) Diagram showing the cutting location of specimens from the welded plate.
- (f) FCAW and SAW specimen dimensions.
- (g) Checking of specimen dimensions after cutting.

To ensure reliability, the immersion test, the SST, and the CCT used more than five test specimens, and the total average value was used as a result. In the result of CCT, the measurement result has shown small deviations arising from the location on the specimen. The corrosion rate of the immersion test, the SST and the CCT were calculated using the following equation:

$$R_c = 87.6 \Delta W / \rho A T,$$

where  $\rho$  is the metal density [ $\text{g cm}^{-3}$ ],  $\Delta W$  is metal weight loss rate [ $\text{mg cm}^{-2}$ ],  $A$  is the exposed area [ $\text{cm}^2$ ],  $T$  is the exposure time [h], and  $R_c$  is the average corrosion rate [millimetres per year].

Table S1. Corrosion rates of experimental specimens obtained from the Immersion test.

| Test condition                | Specimen | Avg. weight loss [g] | Avg. surface area [ $\text{cm}^2$ ] | Weight loss per unit area [ $\text{g/m}^2$ ] | Corrosion rate [mm/yr] |
|-------------------------------|----------|----------------------|-------------------------------------|----------------------------------------------|------------------------|
| 2°C<br>3.5% NaCl<br>Solution  | BM       | 0.012                | 72.61                               | 1.6525                                       | 0.008                  |
|                               | FCAW     | 0.011                | 72.55                               | 1.5115                                       | 0.007                  |
|                               | SAW      | 0.024                | 86.16                               | 2.8049                                       | 0.013                  |
| 15°C<br>3.5% NaCl<br>Solution | BM       | 0.016                | 72.61                               | 2.1800                                       | 0.010                  |
|                               | FCAW     | 0.009                | 72.55                               | 1.1669                                       | 0.005                  |
|                               | SAW      | 0.028                | 86.16                               | 3.2964                                       | 0.015                  |

Table S2. Corrosion rates of experimental specimens obtained from the salt spray test.

| Specimen |      | Surface area [ $\text{cm}^2$ ] | Weight loss per unit area [ $\text{g/m}^2$ ] | Corrosion rate [mm/yr] |
|----------|------|--------------------------------|----------------------------------------------|------------------------|
| BM       | No.1 | 72.59                          | 289.43                                       | 1.342                  |
|          | No.2 | 72.13                          | 266.57                                       | 1.236                  |
|          | No.3 | 72.39                          | 284.58                                       | 1.319                  |
|          | No.4 | 72.42                          | 298.34                                       | 1.383                  |

|      |         |       |        |       |
|------|---------|-------|--------|-------|
|      | No.5    | 72.34 | 279.46 | 1.295 |
|      | Average | 73.37 | 283.67 | 1.315 |
| FCAW | No.1    | 72.18 | 247.03 | 1.145 |
|      | No.2    | 72.10 | 248.10 | 1.150 |
|      | No.3    | 72.28 | 267.43 | 1.240 |
|      | No.4    | 72.29 | 275.04 | 1.275 |
|      | No.5    | 72.05 | 261.65 | 1.213 |
|      | Average | 72.18 | 259.85 | 1.205 |
| SAW  | No.1    | 86.11 | 318.11 | 1.475 |
|      | No.2    | 86.59 | 325.40 | 1.508 |
|      | No.3    | 86.62 | 337.84 | 1.566 |
|      | No.4    | 86.54 | 352.99 | 1.636 |
|      | No.5    | 86.44 | 332.44 | 1.541 |
|      | Average | 86.46 | 333.36 | 1.545 |

Table S3. Corrosion rates of experimental specimens obtained from the cyclic corrosion test.

| Specimen |      | Surface area [cm <sup>2</sup> ] | Weight loss per unit area [g/m <sup>2</sup> ] | Corrosion rate [mm/yr] |
|----------|------|---------------------------------|-----------------------------------------------|------------------------|
| BM       | No.1 | 72.64                           | 708.70                                        | 3.285                  |
|          | No.2 | 72.09                           | 695.61                                        | 3.225                  |
|          | No.3 | 72.46                           | 703.31                                        | 3.260                  |
|          | No.4 | 72.43                           | 708.69                                        | 3.285                  |
|          | No.5 | 72.38                           | 713.05                                        | 3.305                  |
|          | No.6 | 72.88                           | 701.74                                        | 3.253                  |
|          | No.7 | 72.07                           | 687.65                                        | 3.188                  |
|          | No.8 | 72.19                           | 692.49                                        | 3.210                  |

|      |         |         |        |       |
|------|---------|---------|--------|-------|
|      | No.9    | 72.33   | 694.66 | 3.220 |
|      | Average | 72.39   | 700.66 | 3.248 |
| FCAW | No.1    | 72.34   | 468.76 | 2.173 |
|      | No.2    | 72.16   | 498.36 | 2.310 |
|      | No.3    | 72.17   | 495.83 | 2.298 |
|      | No.4    | 72.23   | 488.79 | 2.266 |
|      | No.5    | 72.09   | 481.93 | 2.234 |
|      | No.6    | 72.34   | 484.61 | 2.246 |
|      | No.7    | 72.4811 | 496.67 | 2.302 |
|      | No.8    | 72.13   | 503.67 | 2.335 |
|      | No.9    | 72.20   | 496.96 | 2.304 |
|      | Average | 72.24   | 490.62 | 2.274 |
| SAW  | No.1    | 86.21   | 617.25 | 2.861 |
|      | No.2    | 86.18   | 628.25 | 2.912 |
|      | No.3    | 86.30   | 626.40 | 2.904 |
|      | No.4    | 86.28   | 616.85 | 2.859 |
|      | No.5    | 86.25   | 625.82 | 2.901 |
|      | No.6    | 86.27   | 623.19 | 2.889 |
|      | No.7    | 86.33   | 627.12 | 2.907 |
|      | No.8    | 86.36   | 623.48 | 2.890 |
|      | No.9    | 86.30   | 624.56 | 2.895 |
|      | Average | 86.27   | 623.66 | 2.891 |

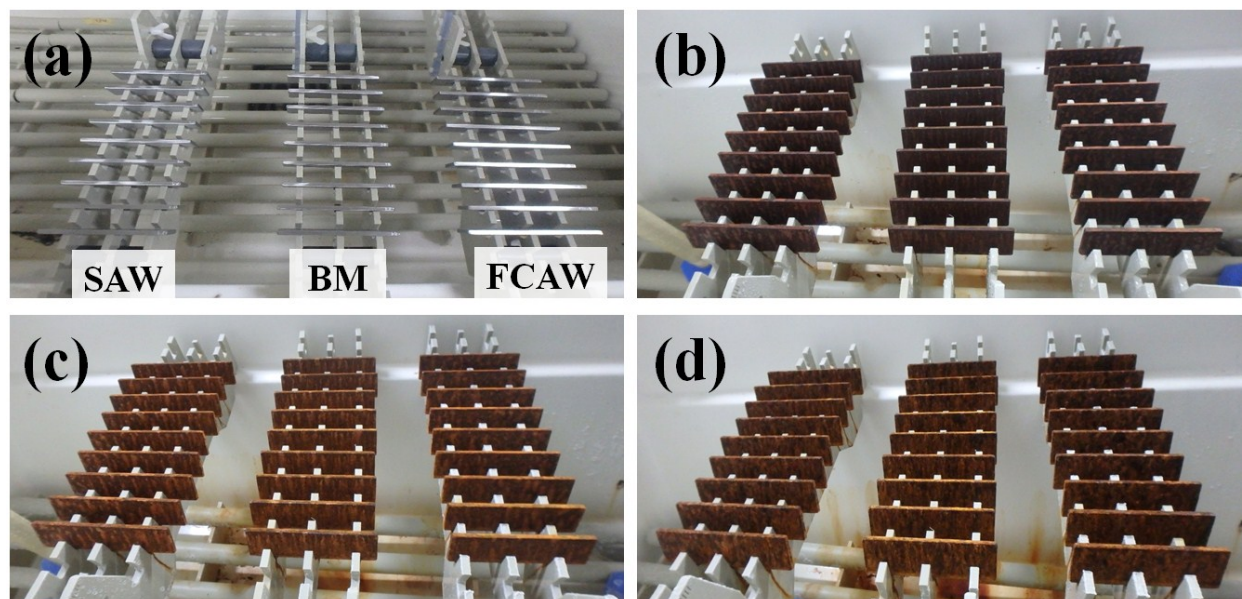

Figure S2. Photograph of BM, FCAW, SAW specimens of (a) before, (b) 6 cycles, (c) 12 cycles, and (d) 18 cycles of CCT.
